## 1 **Spike protein binding prediction with neutralizing antibodies of SARS-CoV-2**

2  
3 Tamina Park<sup>1,2,3,†</sup>, Sang-Yeop Lee<sup>1,4,†</sup>, Seil Kim<sup>1,5,6,†</sup>, Mi Jeong Kim<sup>1,4</sup>, Hong Gi Kim<sup>1</sup>, Sangmi Jun<sup>1,7</sup>, Seung Il  
4 Kim<sup>1,4,6</sup>, Bum Tae Kim<sup>1</sup>, Edmond Changkyun Park<sup>1,4,6,\*</sup>, Daeui Park<sup>1,2,3,\*</sup>

5  
6 <sup>1</sup> *Center for Convergent Research of Emerging Virus Infection, Korea Research Institute of Chemical Technology,*  
7 *Daejeon 34114, Republic of Korea*

8 <sup>2</sup> *Department of Predictive Toxicology, Korea Institute of Toxicology, Daejeon 34114, Republic of Korea*

9 <sup>3</sup> *Department of Human and Environmental Toxicology, University of Science and Technology, Daejeon 34113,*  
10 *Republic of Korea*

11 <sup>4</sup> *Research Center for Bioconvergence Analysis, Korea Basic Science Institute, Cheongju 28119, Republic of*  
12 *Korea*

13 <sup>5</sup> *Division of Chemical and Medical Metrology, Center for Bioanalysis, Korea Research Institute of Standards and*  
14 *Science, Daejeon 34113, Republic of Korea*

15 <sup>6</sup> *Department of Bio-Analysis Science, University of Science & Technology (UST), Daejeon 34113, Republic of*  
16 *Korea*

17 <sup>7</sup> *Center for Research Equipment, Korea Basic Science Institute, Cheongju 28119, Republic of Korea*

18  
19  
20 † These authors contributed equally to this work.

21 \* Corresponding authors: Park, D. (daeui.park@kitox.re.kr), Park E.C. (edpark@kbsi.re.kr)

22

## 23 **Abstract**

24 Coronavirus disease 2019 (COVID-19) is a new emerging human infectious disease caused by Severe Acute  
25 Respiratory Syndrome Coronavirus 2 (SARS-CoV-2, also previously known as 2019-nCoV), originated in  
26 Wuhan seafood and animal market, China. Since December 2019, more than 69,000 cases of COVID-19 have  
27 been confirmed in China and quickly spreads to other counties. Currently, researchers put their best efforts to  
28 identify effective drugs for COVID-19. The neutralizing antibody, which binds to viral capsid in a manner that  
29 inhibits cellular entry of virus and uncoating of the genome, is the specific defense against viral invaders. In this  
30 study, we investigate to identify neutralizing antibodies that can bind to SARS-CoV-2 Spike (S) protein and  
31 interfere with the interaction between viral S protein and a host receptor by bioinformatic methods. The  
32 sequence analysis of S protein showed two major differences in the RBD region of the SARS-CoV-2 S protein  
33 compared to SARS-CoV and SARS-CoV related bat viruses (batSARS-CoV). The insertion regions were close to  
34 interacting residues with the human ACE2 receptor. Epitope analysis of neutralizing antibodies revealed that  
35 SARS-CoV neutralizing antibodies used conformational epitopes, whereas MERS-CoV neutralizing antibodies  
36 used a common linear epitope region, which contributes to form the  $\beta$ -sheet structure in MERS-CoV S protein  
37 and deleted in SARS-CoV-2 S protein. To identify effective neutralizing antibodies for SARS-CoV-2, the  
38 binding affinities of neutralizing antibodies with SARS-CoV-2 S protein were predicted and compared by  
39 antibody-antigen docking simulation. The result showed that CR3022 neutralizing antibody from human may  
40 have higher binding affinity with SARS-CoV-2 S protein than SARS-CoV S protein. We also found that  
41 F26G19 and D12 mouse antibodies could bind to SARS-CoV S protein with high affinity. Our findings provide  
42 crucial clues towards the development of antigen diagnosis, therapeutic antibody, and the vaccine against SARS-  
43 CoV-2.

44

45

46 **Keywords:** SARS-CoV-2, 2019-nCoV, Spike protein, Neutralizing antibody, MERS-CoV

47

## 48 **Introduction**

49 *Coronaviridae* is a family of enveloped viruses which have a single strand, positive-stranded RNA genome and  
50 classified into four genera:  $\alpha$ ,  $\beta$ ,  $\gamma$ , and  $\delta$ . Coronavirus (CoV) has been identified in human and animals including  
51 bats, camels, pigs, cats, and mice. The viruses usually cause mild to moderate upper-respiratory tract illnesses  
52 in human [1]. Two of betacoronaviruses, severe acute respiratory syndrome (SARS) coronavirus (SARS-CoV)  
53 and Middle East respiratory syndrome (MERS) coronavirus (MERS-CoV), caused severe epidemics during the  
54 last two decades. SARS-CoV emerged in November 2002 in Guangdong province, China and affected 29  
55 countries. The epidemic of SARS-CoV resulted in 8,096 human infections and 774 deaths (9.6% fatality rate) by  
56 July 2003 [2]. MERS-CoV was first reported in Saudi Arabia in September 2012 and spread to 28 countries. The  
57 epidemic of MERS-CoV resulted in 2,494 human infections and 858 deaths (34.4% fatality rate) by November  
58 2019 [3].

59 Coronavirus disease 2019 (COVID-19) is newly emerging human infectious disease caused by Severe  
60 Acute Respiratory Syndrome Coronavirus 2 (SARS-CoV-2, also previous known as 2019-nCoV) originated in  
61 Wuhan seafood and animal market. In December 2019, a series of pneumonia cases of unknown cause have been  
62 reported in Wuhan, Hubei province, China [4]. Later, on January 7, a novel CoV was identified from the  
63 bronchoalveolar lavage fluid of a patient [5], and named SARS-CoV-2 by International Committee on  
64 Taxonomy of Viruses [6]. The early COVID-19 patients show symptoms of severe acute respiratory infection,  
65 such as fever, cough, sore throat, nasal congestion, headache, muscle pain or malaise, and severe patients  
66 develop to acute respiratory distress syndrome, sepsis or septic shock [7-9]. As of February 16, 2020, more than  
67 69,200 cases of COVID-19 have been confirmed in China and quickly spreads to other counties [10].

68 The SARS-CoV-2 is a member of betacoronavirus and shows 79% and 50% sequence identity with  
69 SARS-CoV and MERS-CoV, respectively. Phylogenetic analysis revealed that SARS-CoV-2 is most similar  
70 (88% sequence identity) to SARS-like CoVs previously collected from bats in China [5, 11, 12]. Although the  
71 viral pathogenesis of SARS-CoV-2 is unknown, most recent reports suggest that SARS-CoV-2 may use  
72 angiotensin-converting enzyme II (ACE2) as a cellular entry receptor. ACE2 is a well known host cell receptor

73 for SARS-CoV [12]. Shi and colleges showed that SARS-CoV-2 uses ACE2 as a cellular entry receptor but not  
74 other CoV receptors, aminopeptidase N (APN) and dipeptidyl peptidase 4 (DPP4) [13]. Ying and colleges  
75 showed the receptor-binding domain (RBD) of SARS-CoV-2 spike glycoprotein (S protein) interacts with ACE2  
76 [14]. McLaellen and colleges showed that ACE2 binds to SARS-CoV-2 S protein with much higher affinity than  
77 to SARS-CoV S protein [15]. In addition, bioinformatic analysis proposed binding structure of RBD of S protein  
78 (S-RBD) and ACE2 [16]. Thus, it is of great interest to identify neutralizing antibodies that can interact with  
79 SARS-CoV-2 S-RBD and interfere with the binding between viral S protein and host receptor ACE2.

80 After the severe epidemic events of SARS and MERS, researchers have been made great efforts to  
81 discover neutralizing antibodies for CoVs [17, 18]. The neutralizing antibodies for CoVs mainly targeted to S-  
82 RBD. S protein of SARS-CoV-2 shows 76.2% and 34.1% amino acid sequence identity to those of SARS-CoV  
83 and MERS-CoV, respectively. Therefore, the neutralizing antibodies of SARS-CoV and MERS-CoV S proteins  
84 may have a possibility to interact with SARS-CoV-2 S protein and show similar viral neutralization effect. In the  
85 present study, we employed a antibody-antigen docking approach to predict the interaction between SARS-CoV-  
86 2 S-RBD and previously reported neutralization antibodies for SARS-CoV and MERS-CoV.

87

## 88 **Methods**

### 89 *Phylogenetic analysis of SARS-CoV-2 S protein*

90 To comparing of S gene containing S protein among SARS-CoV-2, SARS-CoV, and MERS-CoV strains, the  
91 nucleotide sequences of S gene were retrieved from GISAID [19] and ViPR [20]. The S genes of SARS-CoV-2  
92 were retrieved from initially sequenced 62 genomes of SARS-CoV-2 strains. After removal of identical S gene  
93 sequences, 16 genes of S protein were used in the study. The sequence from SARS-CoV-2 Wuhan-Hu-1  
94 (Genbank MN908947.3 or GISAID EPI\_ISL\_402125) was used as a representative sequence of SARS-CoV-2  
95 strains throughout this study. The closely related strains of SARS-CoV-2 were selected from preliminary and  
96 extensive phylogenetic analysis of SARS-CoV related strains including btSARS-CoV, SARS-CoV and a  
97 MERS-CoV strain. More detail information of the sequences used in this study were listed in Supplementary

98 Table S1. The sequence alignments and phylogenetic analysis were done using MEGA X [21]. The nucleotide  
99 sequence were codon aligned using ClustalW with default parameters and the phylogenetic tree was inferred  
100 using neighbor-joining [22], maximum-likelihood [23], and maximum-parsimony methods [24]. The distance  
101 matrix was calculated based on the Jukes-Cantor methods [25]. The bootstrap values of the phylogenetic tree  
102 were derived from 1,000 replicates [26].

103

#### 104 ***Conservation score and epitope mapping of SARS-CoV-2 S protein***

105 The conservation score of amino acid positions on S protein in SARS-CoV-2 was calculated by ConSurf  
106 program [27]. The multiple sequence alignment of SARS-CoV-2 strain Wuhan-Hu-1 and 12 related strains  
107 (Supplementary Table S1) was used as an input for ConSurf. In ConSurf, conservation scores and confidence  
108 intervals for the conservation scores were calculated using the empirical Bayesian method. The scores were  
109 normalized using the number of inputted sequences. Also, the highest score of ConSurf program means the most  
110 conserved position among sequences. We additionally checked the epitope positions on the SARS-CoV-2 S  
111 protein based on the known epitope information of 11 neutralizing antibodies developing for SARS-CoV and  
112 MERS-CoV. Each information of epitope positions was acquired from literatures (Table 1).

113

#### 114 ***Structure of SARS-CoV-2 S protein***

115 S-RBD protein structure was used cryo-EM structure (Protein Data Bank ID : 6VSB) [15]. To predict the  
116 missing region of cryo-EM structure in SARS-CoV-2 S-RBD, we performed homology modeling based on  
117 known the three dimensional structure of SARS-CoV (PDB ID: 6NB7) using SWISS-MODEL  
118 (<https://swissmodel.expasy.org/>) [28]. Then, the best homology models were selected according to Qualitative  
119 Model Energy ANalysis (QMEAN) statistical parameter. The structures were visualized with UCSF's Chimera  
120 (<https://www.cgl.ucsf.edu/chimera/>).

121

#### 122 ***Neutralizing antibody candidates***

123 As neutralizing antibody candidates of SARS-CoV-2, the five antibodies against SARS-CoV and the six

124 antibodies to prevent MERS-CoV were selected in the study (Table 1). The complex structure of RBD and ten  
125 neutralizing antibodies was retrieved from PDB. The complex structures were superimposed to the RBD  
126 structure of SARS-CoV-2 which were built by homology modeling. The procedures were performed that the  
127 RBD structures of SARS-CoV2 and SARS-CoV were aligned by pairwise sequence alignment. And then the  
128 structures were superimposed according to those pairwise alignments using MatchMaker program [29]. Finally,  
129 we successfully predicted the complex structures of neutralizing antibody candidates and RBD of SARS-CoV-2.  
130 About the antibody such as CR3022 [30] that the structure was not revealed, we performed the antibody structure  
131 modeling with Rosetta program [31].

132

### 133 ***Antibody-antigen docking simulation***

134 Docking simulation between the RBD of SARS-CoV-2 and certain SARS-CoV and MERS-CoV antibodies  
135 were implemented with Rosetta antibody-antigen docking protocols [32]. Rosetta SnugDock program can refine  
136 homology models with the flexible and uncertain region, because the program simulates most of conformation  
137 space available to antibody paratopes [33]. With the complex structures of RBD and antibody candidates, all-  
138 atom relax protocol, docking prepack protocol, and antibody-antigen docking simulation were carried out to  
139 calculate the free energy of low-energy binding conformations. The distribution of docking scores displayed as  
140 funnel plots using interface RMD (interface RMS) versus the binding score ( $dG_{\text{binding}}$ ) between antibody and  
141 antigen (Fig. 4). The binding score was used Rosetta's docking interface score (based on the Talaris2013 force  
142 field) to rank the complexes. Rosetta interface score is defined as  $I_{\text{sc}} = E_{\text{bound}} - E_{\text{unbound}}$ , where  $E_{\text{bound}}$  is  
143 the score of the bound complex and  $E_{\text{unbound}}$  is the sum of the scores of the individual protein partners in  
144 isolation. In addition, 1000 independent docking runs were performed to generate the antibody-antigen models.  
145 To predict possible neutralizing antibody candidates of SARS-CoV-2, the docking results were compared  
146 between interface binding scores of SARS-CoV-2 S-RBD (homology modeling) and interface binding scores of  
147 SARS-CoV or MERS-CoV S-RBD (crystal structure) with 11 antibodies for SARS-CoV and MERS-CoV have  
148 been developed. The statistical significance was tested using student's *t-test*.

149

## 150 **Results and Discussion**

### 151 *Phylogenetic analysis and amino acid variation of S protein*

152 The phylogenetic tree showed that the protein gene sequences were clearly clustered into three groups; SARS-  
153 CoV-2 related, SARS-CoV related and HKU3 related groups (Fig. 1A). SARS-CoV and SARS-CoV-2 groups  
154 formed a rigid monophyletic group with their own closest bat SARS-CoV related strains, respectively. The result  
155 suggested that these two human-pathogenic CoV strains were derived from common ancestral bat CoV. The  
156 sequence alignments showed that there were insertions and deletion during the divergence among the strains  
157 (Fig. 1B and 1C). Various deletions were observed in SARS-CoV related group. The NTD region (position 71-  
158 77, GTNGTKR) of S protein in the strain Wuhan-Hu-1 was mostly conserved in SARS-CoV-2 group but not in  
159 SARS-CoV related group. The NTD region was also conserved in other btSARS-CoV strains but the sequence  
160 similarity was low.

161 Interestingly, human pathogenic strains and their closest strains had two insertion sequences in RBD  
162 region of SARS-CoV-2. The amino acid position 445-449 (VGGNY) and 470-486 (TEIYQAGSTPCNGVEGF)  
163 were conserved in SARS-CoV-2 related group except bat-SL-CoVZC45 strain and the corresponding sequences  
164 in SARS-related groups were ‘STGNY’ and ‘NVPFSPDGKPCPPAL’ (Fig. 1C). The results could not give  
165 clear answers that these insertion sequences had directly diverged from the common ancestor of SARS-CoV and  
166 SARS-CoV-2 or that the sequences in SARS-CoV-2 were derived from SARS-CoV related group by mobile  
167 genetic elements [34]. Nevertheless, the insertion sequences have several antibody epitope regions (Fig. 2) and  
168 the two key residues (amino acid position 455 and 486) interacting with human ACE2 [35] which is used as a  
169 cellular receptor of btSARS-CoV strain WIV1 [36]. This suggested that these sequence were might be related  
170 with human susceptibility and virulence.

### 171 172 *Identification and analysis of the neutralizing antibody epitopes*

173 Previously, numbers of neutralizing antibodies for SARS-CoV and MERS-CoV have been developed [17, 18].  
174 To suggest possible SARS-CoV-2 neutralizing antibodies, monoclonal antibodies were selected from the

175 literature and PDB (Table 1). Epitope map showed that the antibody-binding residues of S protein are located  
176 within RDB region (Fig. 2). Four SARS-CoV neutralizing antibodies had the epitopes about 5 to 14 residues  
177 (total 34 residues, average 9.5 residues) of S-RBD and six MERS-CoV neutralizing antibodies bound to 22 to 33  
178 (total 52 residues, average 25 residues) residues. Distribution of the antibody-binding residues indicates that  
179 SARS-CoV neutralizing antibodies might be bind to mainly conformational epitopes of S-RBD, whereas MERS-  
180 CoV neutralizing antibodies bound to linear epitopes of S-RBD (Fig. 2). Interestingly, the major linear epitope  
181 region (EDGDYYRKQL) for MERS-CoV neutralizing antibodies was specific insertion of MERS-CoV S  
182 protein. MERS-CoV neutralizing antibodies interacted with three receptor binding residues (E536, D537, D539)  
183 in the linear epitope region, which results in the neutralizing activity of antibodies by directly interferes the  
184 binding between S protein and dipeptidyl peptidase 4 of human . In addition, the difference of binding aspect of  
185 neutralizing antibodies might be caused by the difference of subdomain structure of receptor binding motif  
186 (RBM). The RBM of SARS-CoV S protein is made of mainly coiled structure with two short  $\beta$ -sheets, whereas  
187 the RBM of MERS-CoV S protein consists of four long  $\beta$ -sheets [37]. Sequence alignment revealed that RBD of  
188 SARS-CoV-2 was more similar to that of SARS-CoV than MERS-CoV (Fig. 2). Therefore, this suggested that  
189 SARS-CoV neutralizing antibodies could be effective for SARS-CoV-2.

### 190 191 *S-RBD structure modeling and superimposition of neutralizing antibodies*

192 Human infection of SARS-CoV-2 was firstly reported in Wuhan, Hubei province, China last December [4].  
193 Previous studies have reported several results for the interaction between S protein of SARS-CoV-2 and ACE2  
194 as a receptor [13, 14, 16, 38]. However, any interaction of SARS-CoV-2 S protein with developed neutralizing  
195 antibodies for SARS-CoV and MERS-CoV has not been reported yet. The structure of SARS-CoV-2 S protein  
196 was used S protein which revealed by cryo electron microscopy structure. Subsequently, the missing region of  
197 SARS-CoV-2 S-RBD region comprising of 181 amino acids were built from SARS-CoV S proteins (PDB ID:  
198 6NB7) which were good structural templates (Fig. 3 box). In the S-RBD structure, we also displayed  
199 experimentally defined epitope information based on position specific alignment with SARS-CoV or MERS-CoV  
200 antibody binding epitopes.



201 To visualize the overall antibody binding region to SARS-CoV-2, we superimposed the predicted  
202 structure of SARS-CoV-2 RBD protein at the X-ray crystal structure of known antibody-antigen complex from  
203 SARS and MERS (Fig. 3). The structures of five antibodies including m396, 80R, F26G19, S230, and CR3022  
204 developing to prevent SARS-CoV were aligned on SARS-CoV-2 S-RBD successfully (Fig. 3A). The six MERS-  
205 CoV antibodies such as MERS-27, CDC2-C2, m336, 4C2, D12, and MCA1 were also aligned on SARS-CoV-2  
206 S-RBD (Fig. 3B). Because the X-ray crystal structure of CR3022 was not revealed, the optimized structure was  
207 predicted using antibody homology modeling by 1000 structures generated using Rosetta program. As a results,  
208 two SARS-CoV antibodies including CR3022 (-13.91 dG score) and F26G19 (-15.98 dG score) and MERS-CoV  
209 D12 (-14.01 dG score) antibody had higher binding score than other antibodies with SARS-CoV-2 S-RBD  
210 region. However, various MERS-CoV antibodies did not match SARS-CoV-2 because MERS-CoV antibodies  
211 were interacted with the outter region of S-RBD which was located in major linear epitope region  
212 (EDGDYYRKQL) (Fig. 2).

213

#### 214 ***Comparison of Antibody-RBD protein binding interaction***

215 Based on antibody-antigen docking simulation, we calculated the binding scores between 11 antibodies and S-  
216 RBD structures. The antibody-antigen docking simulation generated not only the crystal structures of SARS-  
217 CoV and MERS-CoV S-RBD proteins, but also the high-quaility homology models with SARS-CoV-2 S-RBD.  
218 To suggest S-RBD binding antibody, antibody-RBD docking comparisons were performed using the mean value  
219 of caculated scores from the generated models. The mean scores of the docking simulation are shown in Table 2.

220 Among the SARS-CoV antibodies, only CR3022 showed that the binding affinity of SARS-CoV-2 was  
221 higher than SARS-CoV. In addition, the docking score distribution of CR3022 was significantly changed  
222 between SARS-CoV-2 and SARS-CoV-2 (Fig. 4). For the CR3022 antibody, the mean score of binding affinity  
223 was increased from -11.21 dG score (SARS-CoV, crystal structure) to -13.91 dG score (SARS-CoV-2, cryo-EM  
224 structure) with a *p-value* of 0.00367. The binding affinity of all antibody-antibgen docking was tested using  
225 1000 generated structures. Interestingly, the CR3022 was experimentally performed for the binding effect of  
226 SARS-CoV-2 S-RBD [14]. The researchers found that the CR3022 had the binding effect anaiust SARS-CoV-2

227 S-RBD and that m396 and m336 antibodies did not bind to SARS-CoV-2 S-RBD. The researchers also reported  
228 that the binding affinity of CR3022 was increased to 6.28nM with SARS-CoV-2 from 0.125nM with SARS-  
229 CoV, The results of the docking simulation were consistent with the evidence although more research was  
230 needed to prevent effects, including an experiment using live viruses.

231

## 232 **Conclusions**

233 The fact that CoVs similar to SARS in Chinese bats is most identical to SARS-CoV-2 suggests that SARS-CoV  
234 may have been originated from a common ancestral bat CoV. Comparing the sequences among the three groups,  
235 various deletions were observed in the SARS-CoV related group. Especially, amino acid positions 71-77  
236 (GTNGTKR) in the NTD region of the S protein, 445-449 (VGGNY) and 470-486 (TEIYQAGSTPCNGVEGF)  
237 were noteworthy. The regions were highly conserved in SARS-CoV-2, unlike other SARS-CoVs.

238         Among the neutralizing antibodies for SARS-CoV and MERS-CoV, CR3022 was predicted to have  
239 better binding affinity to the S-RBD region of SARS-CoV-2 than other antibodies. The comparison of antibody  
240 binding region between SARS-CoV-2 and other coronaviruses, such as SARS-CoV and MERS-CoV, was  
241 conducted to apply the suitable diagnostic or therapeutic antibodies and vaccines that are mimetics of extremely  
242 infectious SARS-CoV-2.

243

## 244 **Acknowledgment**

245 We thanks to Prof. Jason S. McLellan for providing cyro-EM structure of of SARS-CoV-2 S protein,  
246 Korea Institute of Science and Technology Information's 5th supercomputer NURION, and bio bigdata  
247 center of Clinomics Inc.. This work was supported by National Research Council of Science and  
248 Technology grant by the Ministry of Science and ICT (Grant No. CRC-16-01-KRICT).

## 249 **References**

- 250 1. Li G, Fan Y, Lai Y, Han T, Li Z, Zhou P, Pan P, Wang W, Hu D, Liu X *et al*: **Coronavirus infections and**  
251 **immune responses**. *J Med Virol* 2020.
- 252 2. **Summary of probable SARS cases with onset of illness form 1 November 2002 to 31 July 2003**  
253 [[https://www.who.int/csr/sars/country/table2004\\_04\\_21/en/](https://www.who.int/csr/sars/country/table2004_04_21/en/)]
- 254 3. **MERS situation update. November 2019** [<https://www.who.int/emergencies/mers-cov/en/>]
- 255 4. **Novel Coronavirus (2019-nCoV) Situation Report -1 (21 January 2020)**  
256 [[https://www.who.int/docs/default-source/coronaviruse/situation-reports/20200121-sitrep-1-2019-](https://www.who.int/docs/default-source/coronaviruse/situation-reports/20200121-sitrep-1-2019-ncov.pdf?sfvrsn=20a99c10_4)  
257 [ncov.pdf?sfvrsn=20a99c10\\_4](https://www.who.int/docs/default-source/coronaviruse/situation-reports/20200121-sitrep-1-2019-ncov.pdf?sfvrsn=20a99c10_4)]
- 258 5. Fan Wu, Su Zhao, Bin Yu, Yan-Mei Chen, Wen Wang, Yi Hu, Zhi-Gang Song, Zhao-Wu Tao, Jun-Hua  
259 Tian, Yuan-Yuan Pei *et al*: **Complete genome characterisation of a novel coronavirus associated with**  
260 **severe human respiratory disease in Wuhan, China**. In: *BioRxiv*. 2020.
- 261 6. Alexander E. Gorbalenya, Susan C. Baker, Ralph S. Baric, Raoul J. de Groot, Christian Drosten, Anastasia  
262 A. Gulyaeva, Bart L. Haagmans, Chris Lauber, Andrey M Leontovich, Benjamin W. Neuman *et al*: **Severe**  
263 **acute respiratory syndrome-related coronavirus: The species and its viruses – a statement of the**  
264 **Coronavirus Study Group**. In: *BioRxiv*. 2020.
- 265 7. K BA, Madhavan A, T RR, Thomas S, Nisha P: **Short chain fatty acids enriched fermentation**  
266 **metabolites of soluble dietary fibre from Musa paradisiaca drives HT29 colon cancer cells to**  
267 **apoptosis**. *PLoS One* 2019, **14**(5):e0216604.
- 268 8. Huang C, Wang Y, Li X, Ren L, Zhao J, Hu Y, Zhang L, Fan G, Xu J, Gu X *et al*: **Clinical features of**  
269 **patients infected with 2019 novel coronavirus in Wuhan, China**. *Lancet* 2020.
- 270 9. Chen N, Zhou M, Dong X, Qu J, Gong F, Han Y, Qiu Y, Wang J, Liu Y, Wei Y *et al*: **Epidemiological**  
271 **and clinical characteristics of 99 cases of 2019 novel coronavirus pneumonia in Wuhan, China: a**  
272 **descriptive study**. *Lancet* 2020.
- 273 10. **Coronavirus disease 2019 (COVID-19) Situation Report – 24 (13 February 2020)**  
274 [[https://www.who.int/docs/default-source/coronaviruse/situation-reports/20200213-sitrep-24-covid-](https://www.who.int/docs/default-source/coronaviruse/situation-reports/20200213-sitrep-24-covid-19.pdf?sfvrsn=9a7406a4_4)  
275 [19.pdf?sfvrsn=9a7406a4\\_4](https://www.who.int/docs/default-source/coronaviruse/situation-reports/20200213-sitrep-24-covid-19.pdf?sfvrsn=9a7406a4_4)]
- 276 11. Lu R, Zhao X, Li J, Niu P, Yang B, Wu H, Wang W, Song H, Huang B, Zhu N *et al*: **Genomic**  
277 **characterisation and epidemiology of 2019 novel coronavirus: implications for virus origins and**  
278 **receptor binding**. *Lancet* 2020.
- 279 12. Li W, Moore MJ, Vasilieva N, Sui J, Wong SK, Berne MA, Somasundaran M, Sullivan JL, Luzuriaga K,  
280 Greenough TC *et al*: **Angiotensin-converting enzyme 2 is a functional receptor for the SARS**  
281 **coronavirus**. *Nature* 2003, **426**(6965):450-454.

- 282 13. Zhou P, Yang XL, Wang XG, Hu B, Zhang L, Zhang W, Si HR, Zhu Y, Li B, Huang CL *et al*: **A pneumonia**  
283 **outbreak associated with a new coronavirus of probable bat origin.** *Nature* 2020.
- 284 14. Xiaolong Tian, Cheng Li, Ailing Huang, Shuai Xia, Sicong Lu, Zhengli Shi, Lu Lu, Shibo Jiang, Zhenlin  
285 Yang, Yanling Wu *et al*: **Potent binding of 2019 novel coronavirus spike protein by a SARS**  
286 **coronavirus-specific human monoclonal antibody.** In: *BioRxiv*. 2020.
- 287 15. Wrapp D, Wang N, Corbett KS, Goldsmith JA, Hsieh CL, Abiona O, Graham BS, McLellan JS: **Cryo-EM**  
288 **structure of the 2019-nCoV spike in the prefusion conformation.** *Science* 2020.
- 289 16. Wan Y, Shang J, Graham R, Baric RS, Li F: **Receptor recognition by novel coronavirus from Wuhan:**  
290 **An analysis based on decade-long structural studies of SARS.** *J Virol* 2020.
- 291 17. Coughlin MM, Prabhakar BS: **Neutralizing human monoclonal antibodies to severe acute respiratory**  
292 **syndrome coronavirus: target, mechanism of action, and therapeutic potential.** *Rev Med Virol* 2012,  
293 **22(1):2-17.**
- 294 18. Han HJ, Liu JW, Yu H, Yu XJ: **Neutralizing Monoclonal Antibodies as Promising Therapeutics against**  
295 **Middle East Respiratory Syndrome Coronavirus Infection.** *Viruses* 2018, **10(12).**
- 296 19. Shu Y, McCauley J: **GISAID: Global initiative on sharing all influenza data - from vision to reality.**  
297 *Euro Surveill* 2017, **22(13).**
- 298 20. Pickett BE, Greer DS, Zhang Y, Stewart L, Zhou L, Sun G, Gu Z, Kumar S, Zaremba S, Larsen CN *et al*:  
299 **Virus pathogen database and analysis resource (ViPR): a comprehensive bioinformatics database**  
300 **and analysis resource for the coronavirus research community.** *Viruses* 2012, **4(11):3209-3226.**
- 301 21. Kumar S, Stecher G, Li M, Knyaz C, Tamura K: **MEGA X: Molecular Evolutionary Genetics Analysis**  
302 **across Computing Platforms.** *Mol Biol Evol* 2018, **35(6):1547-1549.**
- 303 22. Saitou N, Nei M: **The neighbor-joining method: a new method for reconstructing phylogenetic trees.**  
304 *Mol Biol Evol* 1987, **4(4):406-425.**
- 305 23. Felsenstein J: **Evolutionary trees from DNA sequences: a maximum likelihood approach.** *J Mol Evol*  
306 1981, **17(6):368-376.**
- 307 24. Fitch WM: **Toward Defining the Course of Evolution: Minimum Change for a Specific Tree Topology.**  
308 *Systematic Zoology* 1971, **20(4):406-416.**
- 309 25. Jukes TH, Cantor CR: **Evolution of protein molecules.** In: *Mammalian Protein Metabolism*. Edited by  
310 Munro H: Academic Press, New York; 1969: 21-132.
- 311 26. Felsenstein J: **Confidence Limits on Phylogenies: An Approach Using the Bootstrap.** *Evolution* 1985,  
312 **39(4):783-791.**
- 313 27. Landau M, Mayrose I, Rosenberg Y, Glaser F, Martz E, Pupko T, Ben-Tal N: **ConSurf 2005: the**  
314 **projection of evolutionary conservation scores of residues on protein structures.** *Nucleic Acids Res*  
315 2005, **33(Web Server issue):W299-302.**

- 316 28. Biasini M, Bienert S, Waterhouse A, Arnold K, Studer G, Schmidt T, Kiefer F, Gallo Cassarino T, Bertoni  
317 M, Bordoli L *et al*: **SWISS-MODEL: modelling protein tertiary and quaternary structure using**  
318 **evolutionary information**. *Nucleic Acids Res* 2014, **42**(Web Server issue):W252-258.
- 319 29. Meng EC, Pettersen EF, Couch GS, Huang CC, Ferrin TE: **Tools for integrated sequence-structure**  
320 **analysis with UCSF Chimera**. *BMC Bioinformatics* 2006, **7**:339.
- 321 30. ter Meulen J, van den Brink EN, Poon LL, Marissen WE, Leung CS, Cox F, Cheung CY, Bakker AQ,  
322 Bogaards JA, van Deventer E *et al*: **Human monoclonal antibody combination against SARS**  
323 **coronavirus: synergy and coverage of escape mutants**. *PLoS Med* 2006, **3**(7):e237.
- 324 31. Leaver-Fay A, Tyka M, Lewis SM, Lange OF, Thompson J, Jacak R, Kaufman K, Renfrew PD, Smith CA,  
325 Sheffler W *et al*: **ROSETTA3: an object-oriented software suite for the simulation and design of**  
326 **macromolecules**. *Methods Enzymol* 2011, **487**:545-574.
- 327 32. Weitzner BD, Jeliakov JR, Lyskov S, Marze N, Kuroda D, Frick R, Adolf-Bryfogle J, Biswas N, Dunbrack  
328 RL, Jr., Gray JJ: **Modeling and docking of antibody structures with Rosetta**. *Nat Protoc* 2017,  
329 **12**(2):401-416.
- 330 33. Sircar A, Gray JJ: **SnugDock: paratope structural optimization during antibody-antigen docking**  
331 **compensates for errors in antibody homology models**. *PLoS Comput Biol* 2010, **6**(1):e1000644.
- 332 34. Tengs T, Jonassen CM: **Distribution and Evolutionary History of the Mobile Genetic Element s2m in**  
333 **Coronaviruses**. *Diseases* 2016, **4**(3).
- 334 35. Wu K, Peng G, Wilken M, Geraghty RJ, Li F: **Mechanisms of host receptor adaptation by severe acute**  
335 **respiratory syndrome coronavirus**. *J Biol Chem* 2012, **287**(12):8904-8911.
- 336 36. Ge XY, Li JL, Yang XL, Chmura AA, Zhu G, Epstein JH, Mazet JK, Hu B, Zhang W, Peng C *et al*:  
337 **Isolation and characterization of a bat SARS-like coronavirus that uses the ACE2 receptor**. *Nature*  
338 2013, **503**(7477):535-538.
- 339 37. Wang N, Shi X, Jiang L, Zhang S, Wang D, Tong P, Guo D, Fu L, Cui Y, Liu X *et al*: **Structure of MERS-**  
340 **CoV spike receptor-binding domain complexed with human receptor DPP4**. *Cell Res* 2013, **23**(8):986-  
341 993.
- 342 38. Qiang Huang, Herrmann A: **Fast assessment of human receptor-binding capability of 2019 novel**  
343 **coronavirus (2019-nCoV)**. In: *BioRxiv*. 2020.
- 344 39. Zhu Z, Chakraborti S, He Y, Roberts A, Sheahan T, Xiao X, Hensley LE, Prabakaran P, Rockx B, Sidorov  
345 IA *et al*: **Potent cross-reactive neutralization of SARS coronavirus isolates by human monoclonal**  
346 **antibodies**. *Proc Natl Acad Sci U S A* 2007, **104**(29):12123-12128.
- 347 40. Hwang WC, Lin Y, Santelli E, Sui J, Jaroszewski L, Stec B, Farzan M, Marasco WA, Liddington RC:  
348 **Structural basis of neutralization by a human anti-severe acute respiratory syndrome spike protein**  
349 **antibody, 80R**. *J Biol Chem* 2006, **281**(45):34610-34616.

- 350 41. Walls AC, Xiong X, Park YJ, Tortorici MA, Snijder J, Quispe J, Cameroni E, Gopal R, Dai M,  
351 Lanzavecchia A *et al*: **Unexpected Receptor Functional Mimicry Elucidates Activation of Coronavirus**  
352 **Fusion**. *Cell* 2019, **176**(5):1026-1039 e1015.
- 353 42. Pak JE, Sharon C, Satkunarajah M, Auperin TC, Cameron CM, Kelvin DJ, Seetharaman J, Cochrane A,  
354 Plummer FA, Berry JD *et al*: **Structural insights into immune recognition of the severe acute**  
355 **respiratory syndrome coronavirus S protein receptor binding domain**. *J Mol Biol* 2009, **388**(4):815-  
356 823.
- 357 43. Wang L, Shi W, Chappell JD, Joyce MG, Zhang Y, Kanekiyo M, Becker MM, van Doremalen N, Fischer  
358 R, Wang N *et al*: **Importance of Neutralizing Monoclonal Antibodies Targeting Multiple Antigenic**  
359 **Sites on the Middle East Respiratory Syndrome Coronavirus Spike Glycoprotein To Avoid**  
360 **Neutralization Escape**. *J Virol* 2018, **92**(10).
- 361 44. Yu X, Zhang S, Jiang L, Cui Y, Li D, Wang D, Wang N, Fu L, Shi X, Li Z *et al*: **Structural basis for the**  
362 **neutralization of MERS-CoV by a human monoclonal antibody MERS-27**. *Sci Rep* 2015, **5**:13133.
- 363 45. Ying T, Prabakaran P, Du L, Shi W, Feng Y, Wang Y, Wang L, Li W, Jiang S, Dimitrov DS *et al*:  
364 **Junctional and allele-specific residues are critical for MERS-CoV neutralization by an exceptionally**  
365 **potent germline-like antibody**. *Nat Commun* 2015, **6**:8223.
- 366 46. Chen Z, Bao L, Chen C, Zou T, Xue Y, Li F, Lv Q, Gu S, Gao X, Cui S *et al*: **Human Neutralizing**  
367 **Monoclonal Antibody Inhibition of Middle East Respiratory Syndrome Coronavirus Replication in**  
368 **the Common Marmoset**. *J Infect Dis* 2017, **215**(12):1807-1815.
- 369 47. Li Y, Wan Y, Liu P, Zhao J, Lu G, Qi J, Wang Q, Lu X, Wu Y, Liu W *et al*: **A humanized neutralizing**  
370 **antibody against MERS-CoV targeting the receptor-binding domain of the spike protein**. *Cell Res*  
371 2015, **25**(11):1237-1249.
- 372 48. Wang L, Shi W, Joyce MG, Modjarrad K, Zhang Y, Leung K, Lees CR, Zhou T, Yassine HM, Kanekiyo  
373 M *et al*: **Evaluation of candidate vaccine approaches for MERS-CoV**. *Nat Commun* 2015, **6**:7712.  
374

375 **Figures and Tables**

376 **A**

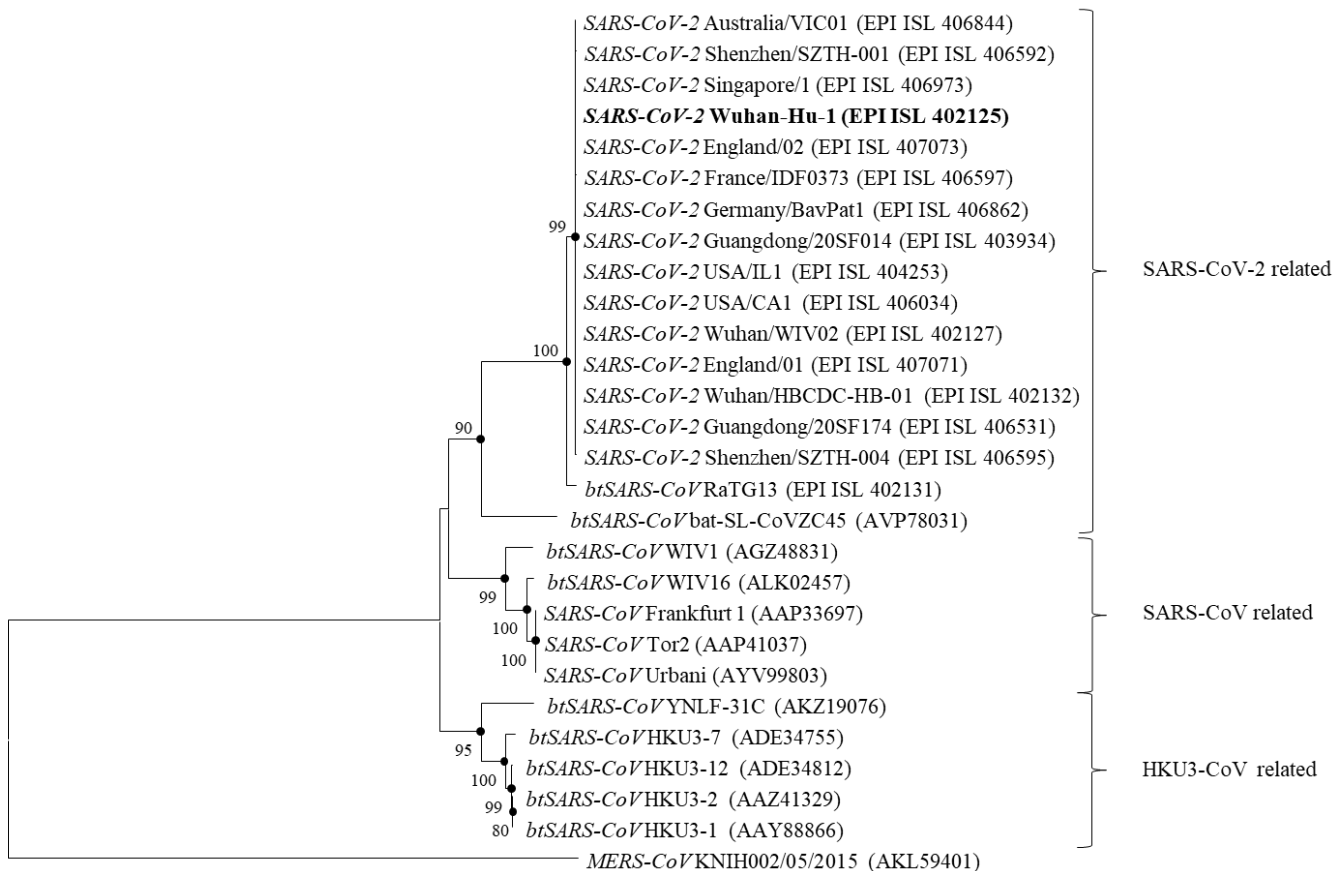

377

378

379

**B**

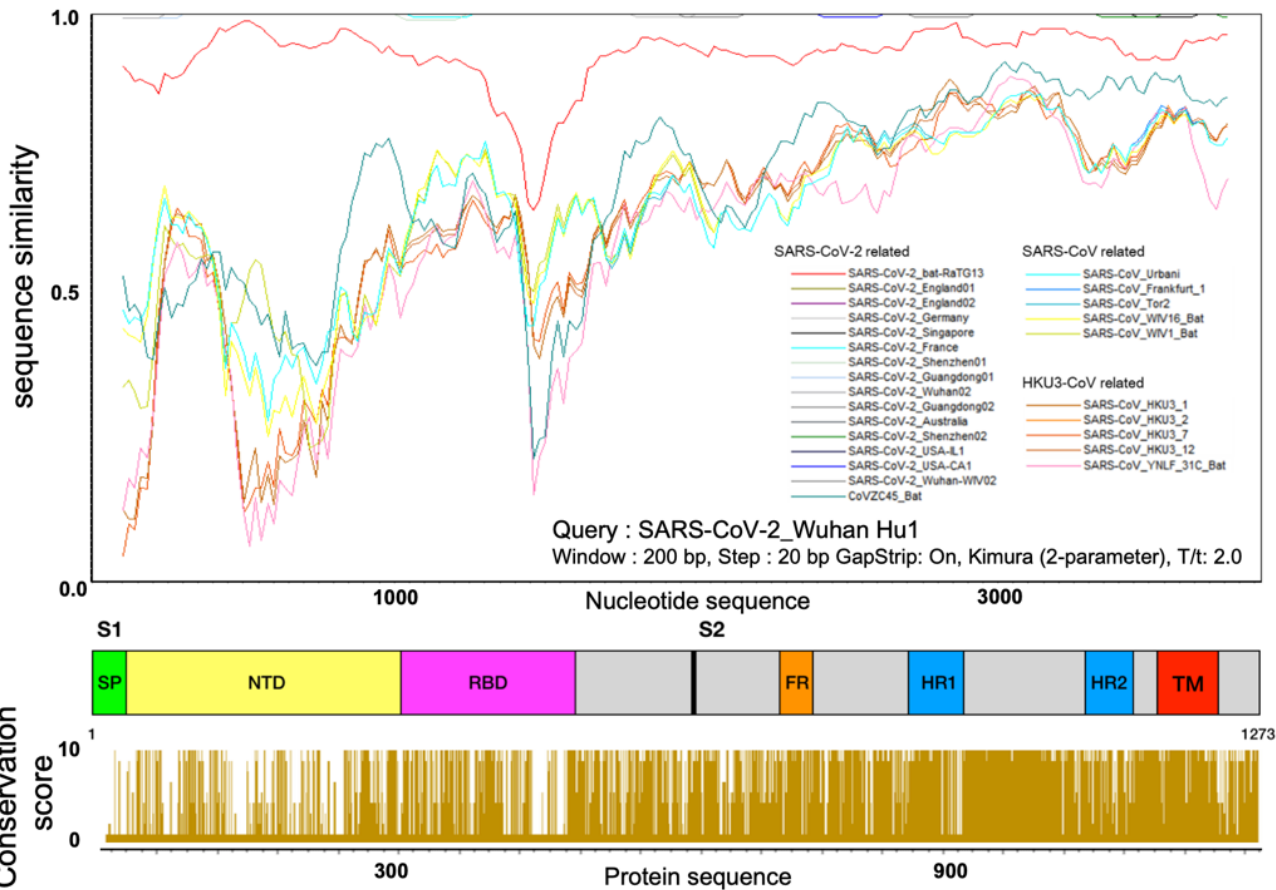

380

381

**C**

|                              |         |          |             |      |          |             |              |                     |              |             |          |
|------------------------------|---------|----------|-------------|------|----------|-------------|--------------|---------------------|--------------|-------------|----------|
|                              | 71      | 77       | 445         | 449  | 470      | 486         |              |                     |              |             |          |
| SARS-CoV-2_Wuhan-Hu-1        | ... HVS | GTNGTKRF | FDN ... NN  | LDSK | VGGNYNY  | LYRLFRKSNL  | KPFPERDIS    | TEIYQAGSTPCNGVEGF   | NCY ...      |             |          |
| SARS-CoV-2_England/01        | ... HVS | GTNGTKRF | FDN ... NN  | LDSK | VGGNYNY  | LYRLFRKSNL  | KPFPERDIS    | TEIYQAGSTPCNGVEGF   | NCY ...      |             |          |
| SARS-CoV-2_England/02        | ... HVS | GTNGTKRF | FDN ... NN  | LDSK | VGGNYNY  | LYRLFRKSNL  | KPFPERDIS    | TEIYQAGSTPCNGVEGF   | NCY ...      |             |          |
| SARS-CoV-2_Germany/BavPat1   | ... HVS | GTNGTKRF | FDN ... NN  | LDSK | VGGNYNY  | LYRLFRKSNL  | KPFPERDIS    | TEIYQAGSTPCNGVEGF   | NCY ...      |             |          |
| SARS-CoV-2_Singapore/1       | ... HVS | GTNGTKRF | FDN ... NN  | LDSK | VGGNYNY  | LYRLFRKSNL  | KPFPERDIS    | TEIYQAGSTPCNGVEGF   | NCY ...      |             |          |
| SARS-CoV-2_France/IDF0373    | ... HVS | GTNGTKRF | FDN ... NN  | LDSK | VGGNYNY  | LYRLFRKSNL  | KPFPERDIS    | TEIYQAGSTPCNGVEGF   | NCY ...      |             |          |
| SARS-CoV-2_Shenzhen/SZTH-004 | ... HVS | GTNGTKRF | FDN ... NN  | LDSK | VGGNYNY  | LYRLFRKSNL  | KPFPERDIS    | TEIYQAGSTPCNGVEGF   | NCY ...      |             |          |
| SARS-CoV-2_Guangdong/20SF174 | ... HVS | GTNGTKRF | FDN ... NN  | LDSK | VGGNYNY  | LYRLFRKSNL  | KPFPERDIS    | TEIYQAGSTPCNGVEGF   | NCY ...      |             |          |
| SARS-CoV-2_Wuhan/HBCDC-HB-01 | ... HVS | GTNGTKRF | FDN ... NN  | LDSK | VGGNYNY  | LYRLFRKSNL  | KPFPERDIS    | TEIYQAGSTPCNGVEGF   | NCY ...      |             |          |
| SARS-CoV-2_Guangdong/20SF014 | ... HVS | GTNGTKRF | FDN ... NN  | LDSK | VGGNYNY  | LYRLFRKSNL  | KPFPERDIS    | TEIYQAGSTPCNGVEGF   | NCY ...      |             |          |
| SARS-CoV-2_Australia/VIC01   | ... HVS | GTNGTKRF | FDN ... NN  | LDSK | VGGNYNY  | LYRLFRKSNL  | KPFPERDIS    | TEIYQAGSTPCNGVEGF   | NCY ...      |             |          |
| SARS-CoV-2_Shenzhen/SZTH-001 | ... HVS | GTNGTKRF | FDN ... NN  | LDSK | VGGNYNY  | LYRLFRKSNL  | KPFPERDIS    | TEIYQAGSTPCNGVEGF   | NCY ...      |             |          |
| SARS-CoV-2_USA/IL1           | ... HVS | GTNGTKRF | FDN ... NN  | LDSK | VGGNYNY  | LYRLFRKSNL  | KPFPERDIS    | TEIYQAGSTPCNGVEGF   | NCY ...      |             |          |
| SARS-CoV-2_USA/CA1           | ... HVS | GTNGTKRF | FDN ... NN  | LDSK | VGGNYNY  | LYRLFRKSNL  | KPFPERDIS    | TEIYQAGSTPCNGVEGF   | NCY ...      |             |          |
| SARS-CoV-2_Wuhan/WIV02       | ... HVS | GTNGTKRF | FDN ... NN  | LDSK | VGGNYNY  | LYRLFRKSNL  | KPFPERDIS    | TEIYQAGSTPCNGVEGF   | NCY ...      |             |          |
| SARS-CoV-2_Yunnan/RaTG13-bat | ... HVS | GTNGIKRF | FDN ... KH  | IDA  | KEGGNFNY | LYRLFRKANL  | KPFPERDIS    | STEIYQAGSKPCNGQTGL  | NCY ...      |             |          |
| SARS-CoV_Frankfurt_1         | ... NHT | -----    | FGN ... RN  | IDA  | TSTGNYNY | KYRYLRHGKLR | PFFERDIS     | SNVPFSPDGKPCPTPPA-L | NCY ...      |             |          |
| SARS-CoV_Tor2                | ... NHT | -----    | FGN ... RN  | IDA  | TSTGNYNY | KYRYLRHGKLR | PFFERDIS     | SNVPFSPDGKPCPTPPA-L | NCY ...      |             |          |
| SARS-CoV_Urbani              | ... NHT | -----    | FGN ... RN  | IDA  | TSTGNYNY | KYRYLRHGKLR | PFFERDIS     | SNVPFSPDGKPCPTPPA-L | NCY ...      |             |          |
| SARS-CoV_WV1-bat             | ... GLN | -----    | FDN ... RN  | IDA  | TQTNVNY  | KYRSLRHGKLR | PFFERDIS     | SNVPFSPDGKPCPTPPA-F | NCY ...      |             |          |
| SARS-CoV_WV16-bat            | ... NHR | -----    | FDN ... RN  | IDA  | TQTNVNY  | KYRSLRHGKLR | PFFERDIS     | SNVPFSPDGKPCPTPPA-F | NCY ...      |             |          |
| SARS-CoV_HKU3 2-bat          | ... NVD | SDRYTY   | -FDN ... AK | HD   | TG       | -----       | NY YRSRHKTKL | KPFPERDLS           | ---SDDG----- | NGV ...     |          |
| SARS-CoV_HKU3 7-bat          | ... NVD | SDRYTY   | -FDN ... AK | QD   | TG       | -----       | NY YRSRHKTKL | KPFPERDLS           | ---SDDG----- | NGV ...     |          |
| SARS-CoV_HKU3 12-bat         | ... NVD | SDRYTY   | -FDN ... AK | HD   | TG       | -----       | NY YRSRHKTKL | KPFPERDLS           | ---SDDG----- | NGV ...     |          |
| SARS-CoV_HKU3 1-bat          | ... NVD | SDRYTY   | -FDN ... AK | HD   | TG       | -----       | NY YRSRHKTKL | KPFPERDLS           | ---SDDG----- | NGV ...     |          |
| SARS-CoV_YNLF 31C-bat        | ... SI  | QSDKIVY  | -FDN ... AK | YD   | VG       | -----       | SY FYRSRHS   | SKL                 | KPFPERDLS    | ---SEE----- | NGA ...  |
| SARS-CoV_CoVZC45-bat         | ... TT  | NNAATKR  | FDN ... AK  | QD   | VG       | -----       | NY FYRSRHS   | STKL                | KPFPERDLS    | SSDE-----   | NGVR ... |

382



383 **Figure 1.** (A) Neighbor-joining tree based on spike protein gene sequences showing the relationship between  
384 2019-nCoV and related SARS-related viruses. The bootstrap value greater than 50 are shown at the branch nodes.  
385 The filled circles indicated that the corresponding nodes are conserved in all tree-drawing methods. MERS-CoV  
386 KNIH002/05/2015 is used as the outgroup. Bar, 0.1 substitutions per nucleotide position. (B) The upper panel is  
387 structure of spike gene of SARS-CoV-2. The middle panel is the result of the Sim plot analysis. The sequence  
388 similarity of NTD domain region was the lowest among spike genes. Nevertheless, SARS-CoV-2\_bat-RaTG13  
389 had highly conserved in NTD domain than other SARS-CoVs. On the other hand, in the RBD region, not only  
390 SARS-CoV but also SARS-CoV-2\_bat-RaTG13 showed low sequence similarity. The lower panel indicates the  
391 conservation score of the protein sequences of 27 SARS-CoV species. (C) Intersertional regions in SARS-CoV-2  
392 S protein. The amino acid position 445-449 (VGGNY) and 470-486 (TEIYQAGSTPCNGVEGF) were conserved  
393 in SARS-CoV-2 related group except bat-SL-CoVZC45 strains (red color), and the corresponding sequences in  
394 SARS-related groups were ‘STGNY’ and ‘NVPFSPDGKPCPPAL’ (blue color).  
395

396

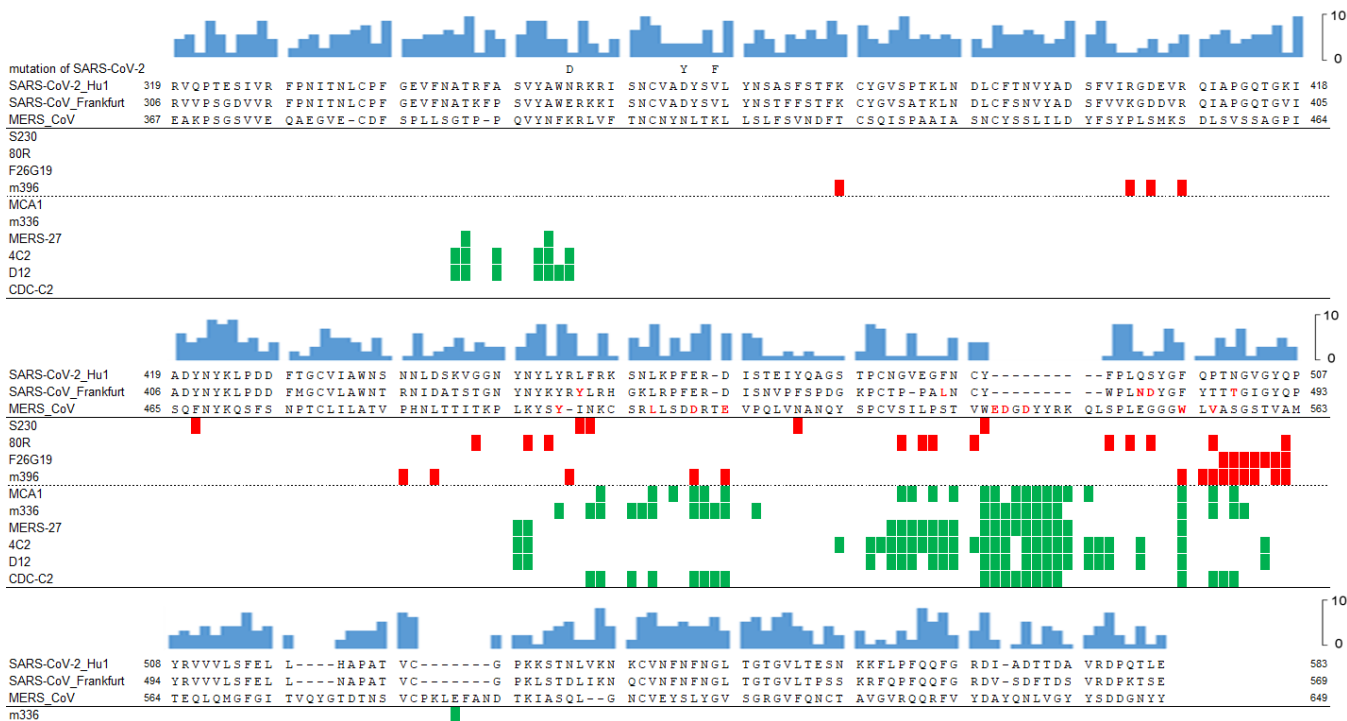

397

398 **Figure 2.** Epitope map and conversation score of the RBD region in SARS-CoV and MERS-CoV S protein. The

399 blue bar chart shows the conservation score. The numbers are the amino acid positions in the S protein. Color

400 boxes indicate binding epitopes for SARS-CoV (red color) and MERS-CoV (green color) antibodies. The amino

401 acid residues in red color indicate binding epitopes for host receptors.

402

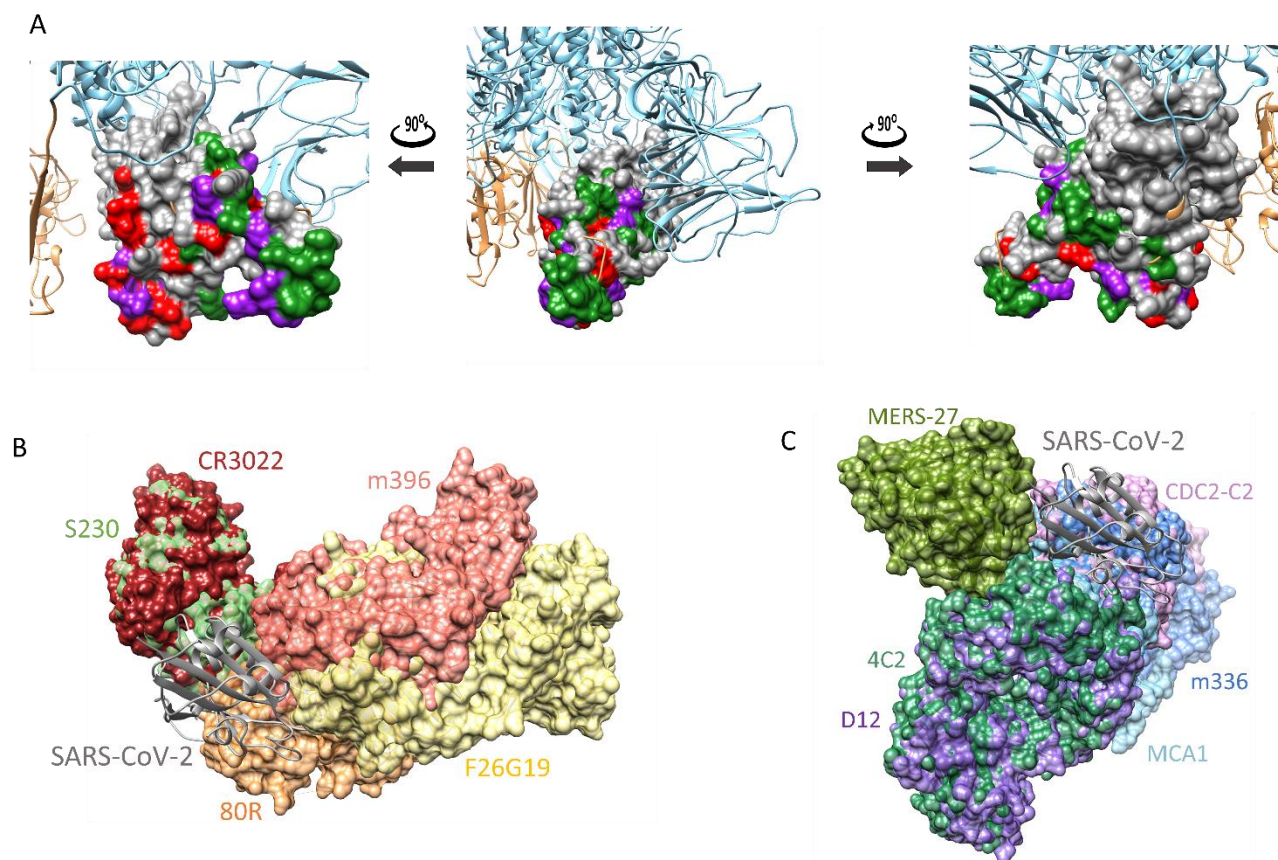

403

404 **Figure 3.** The three dimensional structure of SARS-CoV-2 S protein. (A) The three dimensional structure of  
405 RBD domain in S protein was colored gray. The RBD structure shown from various sides. On the surface  
406 representation, the SARS-CoV antibodies, MERS-CoV antibodies, and both SARS-CoV and MERS-CoV  
407 antibodies binding epitopes are colored red, green, and purple, respectively. The sky blue color represents  
408 SARS-CoV-2 S protein and the RBD domain were highlighted with orange color. The red box indicates the  
409 RBD region, which is containing SARS-CoV or MERS-CoV antibody binding epitope. The predicted RBD  
410 structure of SARS-CoV-2 S protein in complex with five SARS-CoV antibodies (B) and six MERS-CoV  
411 antibodies (C). The complex structure was predicted by integrating the previously known complex structures of  
412 SARS-CoV or MERS-CoV with antibodies using the superimposition of structures. Each colored structure in  
413 surface representation indicates antibody labeled with the same color. More detail information about antibodies  
414 were described in Table 1.

415

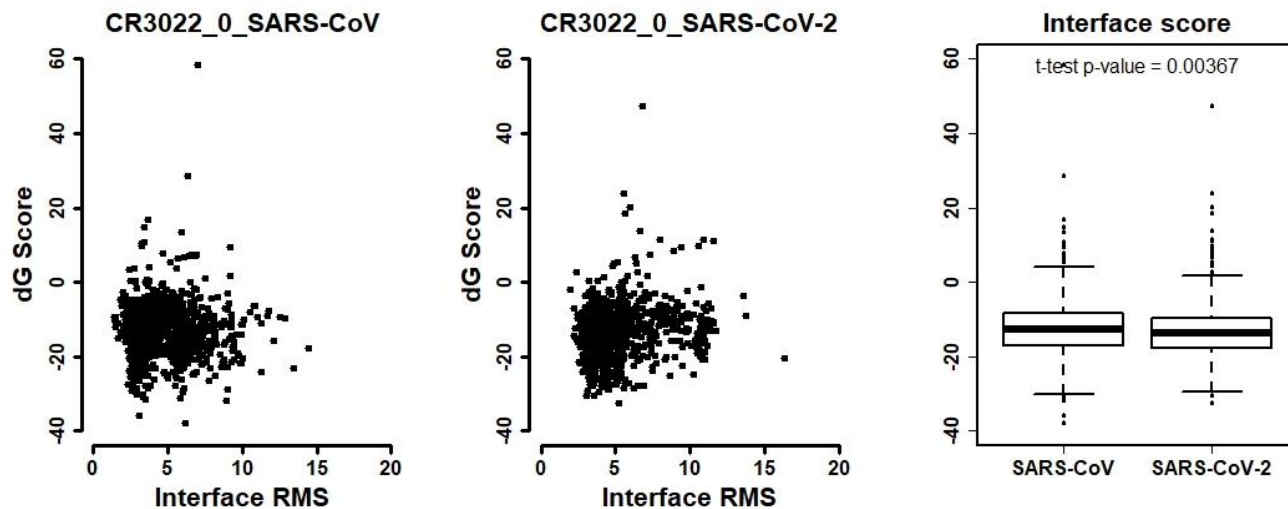

416

417 **Figure 4.** The distribution of docking scores between antibody and antigen using interface RMD (interface  
418 RMS) versus the binding energy (dG binding). The docking simulation were performed by 1000 generated  
419 antibody-antigen structures. The statistical significance was tested using student's *t-test*. (A) Mean score of  
420 docking simulation between CR3022 and SARS-CoV S-RBD was -11.21 dG score, and mean score of CR-3022  
421 and SARS-CoV2 S-RBD was -13.61 dG score (*p-value* = 0.00367).

422

**Table 1.** Neutralizing antibodies and their epitopes analyzed in the study.

| Target   | Name    | Origin    | RBD binding residues                                                                                                                                                                                 | PDB ID | Reference |
|----------|---------|-----------|------------------------------------------------------------------------------------------------------------------------------------------------------------------------------------------------------|--------|-----------|
| SARS-CoV | m396    | Human     | K365, K390, D392, R395, R426, D429, R441, E452, D454, F483, Y484, T485, T486, T487, G488, I489, Y491, Q492                                                                                           | 2DD8   | [39]      |
|          | 80R     | Human     | T433, N437, K439, P469, P470, A471, C474, W476, L478, D480, T485, Q492                                                                                                                               | 2GHW   | [40]      |
|          | S230    | Human     | L443, Y408, Y442, F460, Y475                                                                                                                                                                         | 6NB6   | [41]      |
|          | F26G19  | Mouse     | T486, T487, G488, I489, G490, Y491, Q492                                                                                                                                                             | 3NGF   | [42]      |
|          | CR3022  | Human     | n.a.                                                                                                                                                                                                 | n.a.   | n.a.      |
| MERS-CoV | MERS-27 | Human     | T392, N398, L495, K496, V527, S528, I529, V530, P531, S532, T533, W535, E536, D537, G538, D539, Y540, Y541, R542, K543, W553                                                                         | 5YY5   | [43, 44]  |
|          | CDC2-C2 | Human     | N501, K502, S504, F506, D510, R511, T512, E513, W535, E536, D537, G538, D539, Y540, Y541, R542, W553, V555, A556, S557                                                                               | 6C6Z   | [43]      |
|          | m336    | Human     | Y499, N501, K502, S504, R505, F506, D510, R511, T512, E513, P515, W535, E536, D537, G538, D539, Y540, Y541, R542, W553, V555, S557, G558, S589                                                       | 4XAK   | [43, 45]  |
|          | MCA1    | Human     | K502, F506, S508, D510, R511, E513, S528, I529, P531, T533, W535, E536, G538, D539, Y540, Y541, R542, K543, Q544, W553, V555, S557                                                                   | 5GMQ   | [43, 46]  |
|          | 4C2     | Humanized | G391, T392, P394, Y397, N398, K400, L495, K496, Y523, P525, C526, V527, S528, I529, V530, P531, S532, T533, V534, W535, E536, D537, D539, Y540, Y541, R542, K543, Q544, L545, S546, E549, W553, T560 | 5DO2   | [43, 47]  |
|          | D12     | Mouse     | G391, T392, P394, Y397, N398, F399, K400, L495, K496, P525, V527, S528, I529, P531, S532, T533, W535, E536, D537, D539, Y540, Y541, R542, K543, Q544, L545, S546, E549, W553, T560                   | 4ZPT   | [43, 48]  |

**Table 2.** Antibody-antigen docking score and experimental affinity

| Antibody       | SARS/MERS-CoV S-RBD |                 | SARS-CoV-2 S-RBD   |                 | p-value   |
|----------------|---------------------|-----------------|--------------------|-----------------|-----------|
|                | Docking (dG score)  | Experiment (nM) | Docking (dG score) | Experiment (nM) |           |
| m396 (SARS)    | -21.92              | 0.0046          | -6.92              | No binding      | < 2.2e-16 |
| 80R (SARS)     | -12.04              | 1.59            | -3.59              | -               | 3.986e-07 |
| S230 (SARS)    | -7.18               | -               | -7.48              | -               | 0.7731    |
| F26G19 (SARS)  | -17.16              | 0.45            | -15.98             | -               | 2.049e-05 |
| CR3022 (SARS)  | -11.21              | 0.125           | -13.91             | 6.28            | 0.00367   |
| MERS27 (MERS)  | -13.12              | 71.2            | -4.26              | -               | < 2.2e-16 |
| CDC2-C2 (MERS) | -28.21              | 2.65            | -11.63             | -               | < 2.2e-16 |
| m336 (MERS)    | -23.21              | 0.0994          | -12.05             | No binding      | < 2.2e-16 |
| MCA1 (MERS)    | -26.74              | -               | -10.69             | -               | < 2.2e-16 |
| 4C2 (MERS)     | -21.12              | 317             | -11.48             | -               | < 2.2e-16 |
| D12 (MERS)     | -22.03              | 6.63            | -14.01             | -               | < 2.2e-16 |
